# Supplementary material
Source: publisher figshare collection journal article supplement (https://frontiersin.figshare.com/ndownloader/files/22405965)
Supplement: Supplementary file 1 [file 22405965]

## Supplemental Information

### **Dynamics of intestinal inflammatory cytokines and tight junction proteins of turbot (*Scophthalmus maximus* L.) during the development and recovery of enteritis induced by dietary $\beta$ -conglycinin**

Jing Zheng<sup>1</sup>, Pei Yang<sup>1</sup>, Jihong Dai<sup>1</sup>, Guijuan Yu<sup>1</sup>, Weihao Ou<sup>1</sup>, Weiqi Xu<sup>1</sup>, Kangsen Mai<sup>1, 2</sup>, Yanjiao Zhang<sup>1, 2</sup>\*

<sup>1</sup>The Key Laboratory of Aquaculture Nutrition and Feed (Ministry of Agriculture) & the Key Laboratory of Mariculture (Ministry of Education), Ocean University of China, Qingdao, 266003, PR China

<sup>2</sup>Laboratory for Marine Fisheries Science and Food Production Processes, Qingdao National Laboratory for Marine Science and Technology, Qingdao 266237, China

\*Correspondence: Yanjiao Zhang, Ocean University of China, 5 Yushan Road, Qingdao 266003, China

e-mail: [yanjiaozhang@ouc.edu.cn](mailto:yanjiaozhang@ouc.edu.cn) (Y. Zhang).

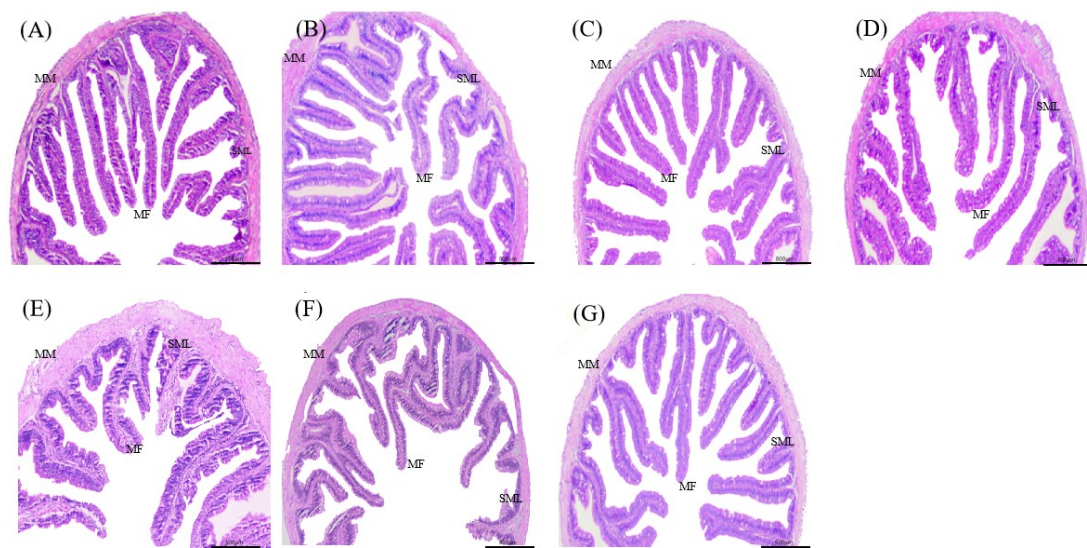

**FIGURE S1** Histological changes of the distal intestine section from turbot in 7S&FM group at the zero day (A), the third day (B), the first week (C), the second week (D), the third week (E), the sixth week (F) and the tenth week (G). MF: mucosal fold; MM: muscularis mucosa; SML: submucous layer; Scale bar, 500  $\mu$ m. Staining: H & E.
